# Supplementary material for: Switching to Regular Diet Partially Resolves Liver Fibrosis Induced by High-Fat, High-Cholesterol Diet in Mice
Source: MDPI journal article supplement (doi:10.3390/nu14020386), 2022-01-17
Supplement: s1 [file s1]

Diet composition:

Suppliers provided diet compositions are mentioned in Table S1 and S2. Table S1 depicts the energy density (Kcal/g) with energetic part of protein, carbohydrates and fat of the standard diet (SD) and the high-fat high-cholesterol diet (HFHCD). Table S2 depicts the composition in lipids (% by weight) of the standard diet (SD) and the high-fat high-cholesterol diet (HFHCD).

Table S1: SD, HFHCD composition in proteins, carbohydrates and fats

| Diet composition | SD         | HFHCD        |
|------------------|------------|--------------|
| Energy density   | 3 (Kcal/g) | 6.5 (Kcal/g) |
| Protein          | 22%        | 6%           |
| Carbohydrates    | 66%        | 8%           |
| Fats             | 12%        | 86%          |

Table S2: SD, HFHCD composition in fats

| Fats composition                  | SD  | HFHCD |
|-----------------------------------|-----|-------|
| Total fats (%) by weight          | 4   | 61.9  |
| Total saturated fatty acids       | 0.6 | 36.4  |
| Total monounsaturated fatty acids | 0.7 | 20.4  |
| Total polyunsaturated fatty acids | 2.1 | 2.1   |
| Cholesterol                       | 0   | 1.5   |

Table S3. Primer sequences.

| Mouse Gene            | Forward primers               | Reverse primers              |
|-----------------------|-------------------------------|------------------------------|
| <i>18S</i>            | 5'-CGCCGCTAGAGGTGAAATTC-3'    | 5'-TTGGCAAATGCTTTTCGCTC-3'   |
| <i>Tnf-α</i>          | 5'-TAGCTCCCAGAAAAGCAAGC-3'    | 5'-TTTCTGGAGGGAGATGTGG-3'    |
| <i>Ccl2</i>           | 5'-TCCCAATGAGTAGGCTGGAG-3'    | 5'-TCTGGACCCATTCCTTCTTG-3'   |
| <i>Hmox-1</i>         | 5'-AGGTACACATCCAAGCCGAGA-3'   | 5'-CATCACCAGCTTAAAGCCTTCT-3' |
| <i>Cybb (Nox-2)</i>   | 5'-AGTGCGTGTGCTCGACAA-3'      | 5'-GCGGTGTGCAGTGCTATCAT-3'   |
| <i>Nfe2l2 (Nrf-2)</i> | 5'-TAGATGACCATGAGTCGCTTGC-3'  | 5'-GCCAAACTTGCTCCATGTCC-3'   |
| <i>Nqo1</i>           | 5'-AGGATGGGAGGTACTCGAATC-3'   | 5'-AGGCGTCCTTCCTTATATGCTA-3' |
| <i>Tgfb1</i>          | 5'-CACCATCCATGACATGAACC-3'    | 5'-CAGAAGTTGGCATGGTAGCC-3'   |
| <i>Acta2 (α-SMA)</i>  | 5'-GTCCCAGACATCAGGGAGTAA-3'   | 5'-TCGGATACTTCAGCGTCAGGA-3'  |
| <i>Col1a1</i>         | 5'-GCTCCTGCTCCTCTTAGGG -3'    | 5'-GCAGAAAGCACAGCACTCG -3'   |
| <i>Timp1</i>          | 5'- TTCCAGTAAGGCCTGTAGC-3'    | 5'-TTATGACCAGGTCCGAGTT -3'   |
| <i>Timp2</i>          | 5'-CTGGGACACGCTTAGCATCA -3'   | 5'-GACAGCGAGTGATCTTGAC -3'   |
| <i>Timp3</i>          | 5'-GAAGCCTCTGAAAGTCTTTGTGG-3' | 5'-ACATCTTGCCTTCATACACGC-3'  |
| <i>Mmp2</i>           | 5'- ATGGTAAACAAGGCTTCATG-3'   | 5'-TTGAGAAGGATGGCAAGTAT -3'  |
| <i>Mmp9</i>           | 5'-CATTCGCGTGGATAAGGAGT -3'   | 5'-TCACACGCCAGAAGAAATTG-3'   |
| <i>Mmp13</i>          | 5'-ACACTGGCAAAAGCCATTTC-3'    | 5'-TTTGGGATGCTTAGGGTTG-3'    |

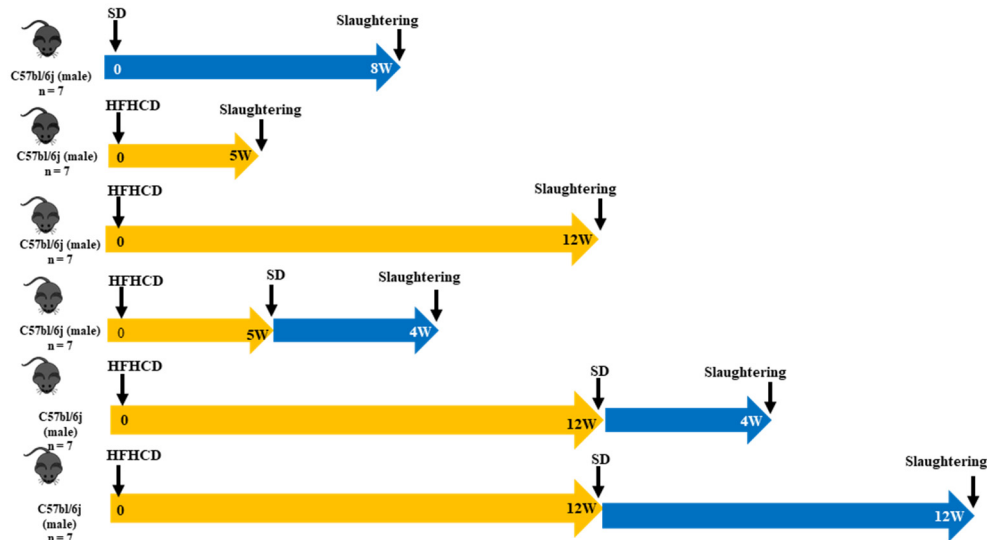

Figure S1: Schematic illustration of all treated groups.

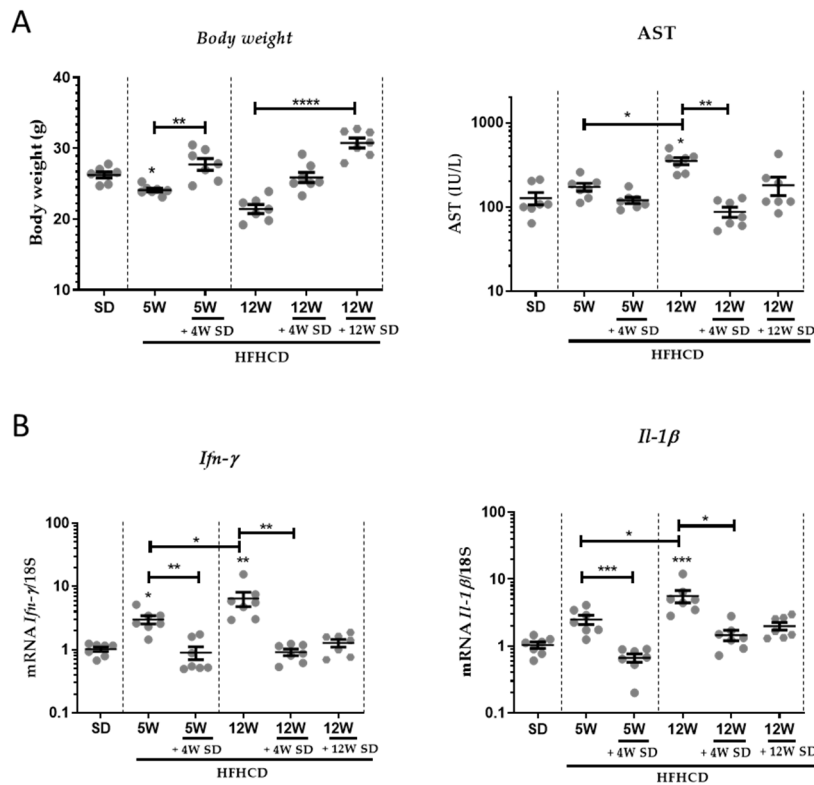

Figure S2: Switching to regular diet resulted in significant changes in body weight, liver damage and inflammation. Six groups of seven male mice were given separate diet regimens of either a standard diet (SD) or a high-fat high-cholesterol diet (HFHCD) for 5 or 12 weeks (W) with some groups returning to the SD for an additional period of 4 or 12 weeks. (A) Total body weight of each mice in grams and levels of AST in plasma. (B) Liver transcript expression of *Ifn-γ* and *Il-1β*. For all graphs, each dot represents an individual and errors bars are expressed as means  $\pm$  SEM (\* $p < 0.05$ , \*\* $p < 0.01$ , \*\*\* $p < 0.001$  and \*\*\*\* $p < 0.0001$ ).
